# Supplementary material
Source: Elsevier journal article supplement (https://www.sciencedirect.com/science/article/pii/S0021755721001194)
Supplement: mmc1 [file S0021755721001194:mmc1.docx]

**JPED-D-21-00024 – Supplementary Material**

**Supplementary material Figure 1 – Logarithmic regression between daily time on physical activity and body fat% of 53 cerebral palsy children.**

**
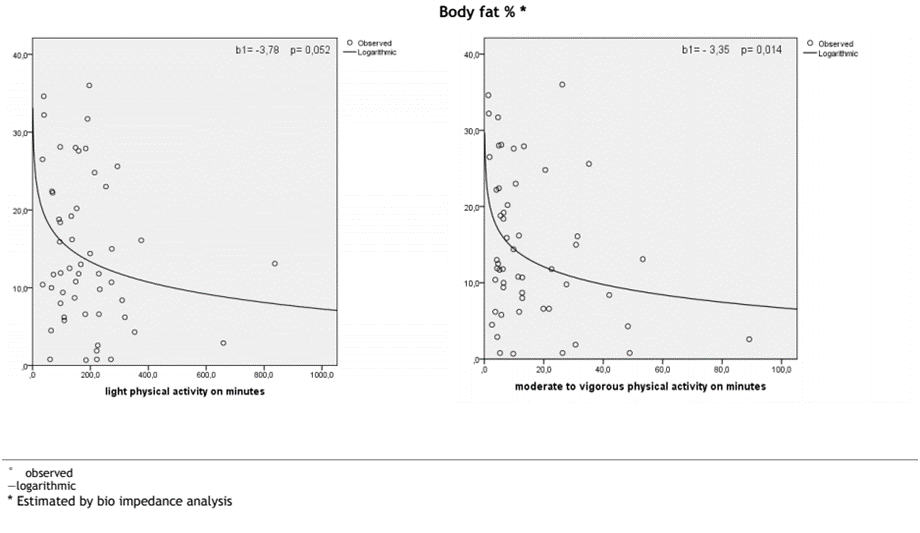
**
